# Supplementary material for: pH- and temperature-responsive aqueous foams stabilized by hairy latex particles
Source: Royal Society of Chemistry journal article supplement (doi:10.1039/c4sm02236j), 2014-11-19
Supplement: c4sm02236j1.pdf [file c4sm02236j1.pdf]

## Supporting Information

*Soft Matter* manuscript ‘pH- and Temperature-Responsive  
Aqueous Foams Stabilized by Hairy Latex Particles’

by S. Fujii *et al.*

Corresponding author: Dr. Syuji Fujii; [syuji.fujii@oit.ac.jp](mailto:syuji.fujii@oit.ac.jp)

### *Calculation of a polymerization degree of PDMA macroinitiator*

Degree of polymerization was calculated from  $^1\text{H}$  NMR result by rationing the proton peak intensity due to PDMA at 4.04 ppm to that originated from 2,2'-azobis[2-methyl-N-(2-(2-bromoisobutyryloxy)ethyl) propionamide], which was used as an initiator for atom transfer radical polymerization to synthesize the PDMA macroinitiator, at 1.31 ppm. It is clear that there is a good agreement between the targeted (theoretical) degree of polymerization calculated from the monomer/initiator molar ratio and that determined experimentally from  $^1\text{H}$  NMR study.

### *Calculation of number of amine groups on the PS particle*

The number of amine groups on one PDMA-PS particle was calculated to be  $3.21 \times 10^6$  considering the PDMA/PS weight ratio of 2.86/97.14, which was determined by elemental microanalysis. For calculation of incorporation amount of amine groups, the diameter of 380 nm and density of PS of  $1.05 \text{ g/cm}^3$  [1] were used.

### *Calculation for the diameter of gyration of the PDMA chain*

The diameter of gyration of the PDMA chain ( $D$ ) was calculated using the equation shown below [2],

$$D = 2\sqrt{\frac{na^2}{6}}$$

where  $n$  and  $a$  are bond number ( $2 \times 60$ ) and bond length (0.154 nm), respectively.

[1] J. Brandrup, E. H. Immergut, E. A. Grulke, *Polymer Handbook*, 4th ed.; Wiley: New York, 1999.

[2] S. Fujii, K. Aono, M. Suzaki, S. Hamasaki, S. Yusa and Y. Nakamura, *Macromolecules*, 2012, **45**, 2863.

**Supporting Table S1.** pH- and temperature-dependent behavior of foams prepared using the PDMA<sub>60</sub>-PS latex particles (5.0 wt%, 0.1 M NaCl). Height of the foam layer versus pH of the aqueous dispersion recorded at different times: immediately after preparation, after 1 hour and after 24 hours.

| pH | Temperature |      |      |       |      |      |
|----|-------------|------|------|-------|------|------|
|    | 23 °C       |      |      | 55 °C |      |      |
|    | 0 h         | 1 h  | 24 h | 0 h   | 1 h  | 24 h |
| 3  | 0.00        | 0.00 | 0.00 | 0.00  | 0.00 | 0.00 |
| 4  | 0.00        | 0.00 | 0.00 | 0.00  | 0.00 | 0.00 |
| 5  | 0.00        | 0.00 | 0.00 | 0.00  | 0.00 | 0.00 |
| 6  | 6.34        | 0.00 | 0.00 | 5.21  | 5.20 | 4.81 |
| 7  | 7.28        | 7.36 | 0.00 | 9.88  | 9.91 | 8.74 |
| 8  | 7.62        | 7.65 | 0.00 | 8.67  | 8.63 | 8.13 |
| 9  | 7.22        | 6.64 | 0.00 | 8.81  | 8.69 | 8.71 |
| 10 | 7.12        | 6.55 | 0.00 | 9.94  | 8.83 | 8.99 |

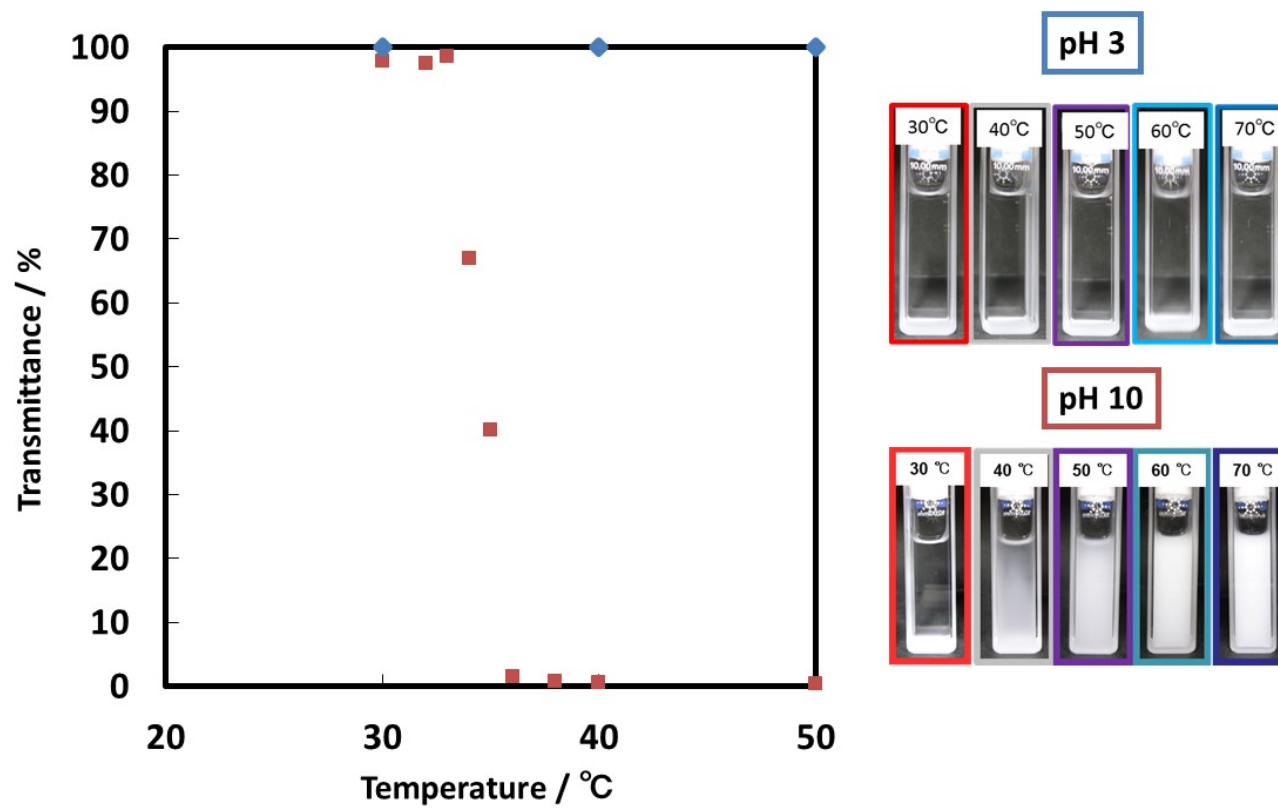

**Supporting Figure S1.** Percent transmittance (%T) at 545 nm for PDMA at (◆) pH 3 and (■) pH 10 at 1.0 wt% as a function of temperature. (0.1 M NaCl)

(a) 23 °C

0 min.  $pK_a$  7.07 (0.1 M NaCl)

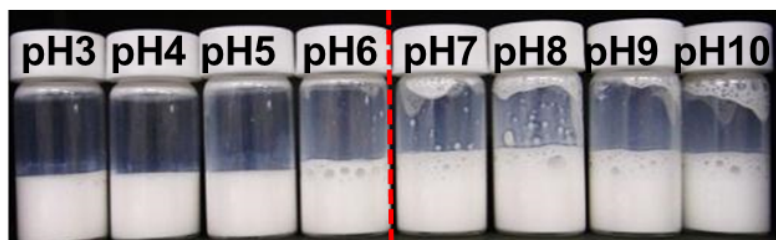

24 h

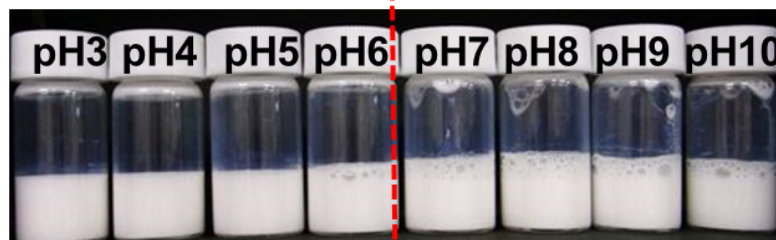

(b) 55 °C

0 min.  $pK_a$  7.07 (0.1 M NaCl)

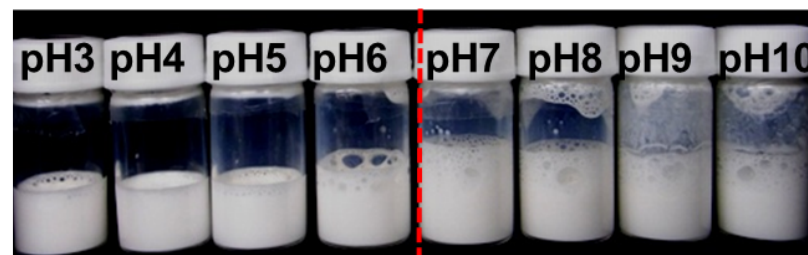

24 h

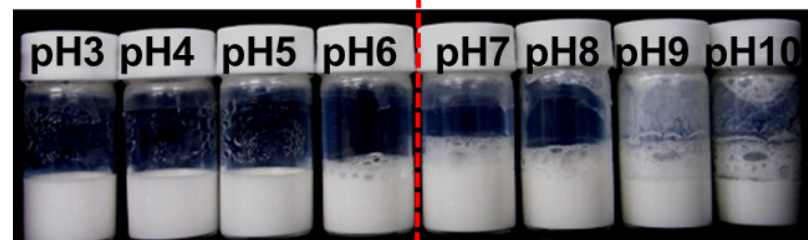

**Supporting Figure S2.** pH- and temperature-dependent behavior of foams prepared using the PDMA-PS latex particles (5.0 wt%, 0.1 M NaCl). Digital photograph of vessels taken 24 h after shaking an aqueous dispersion of particles at different pH values at (a) 23 °C and (b) 55 °C.
